# Supplementary material
Source: Springer Nature journal article supplement (https://www.springermedizin.de/resource/supplementary/12995_2011_200_MOESM4_ESM.pdf/9622930)

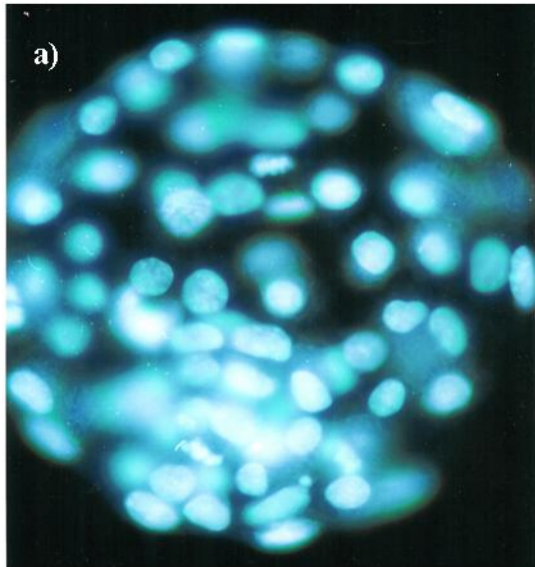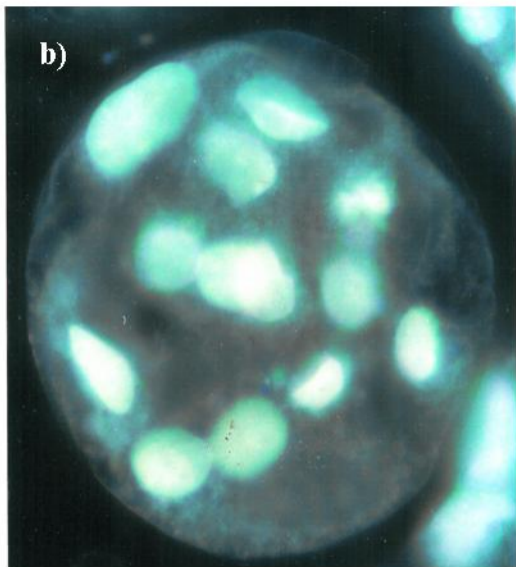

Supplement: MOESM4 [file 9622930]
